# Supplementary material for: Endoplasmic reticulum stress response and bile acid signatures associate with multi-strain seroresponsiveness during elderly influenza vaccination
Source: PubMed Central journal article supplement — iScience. 2021 Aug 11;24(9):102970. doi: 10.1016/j.isci.2021.102970 (PMC8387917; doi:10.1016/j.isci.2021.102970), 2021-08-11
Supplement: mmc1.pdf [file mmc1.pdf]

**Supplemental information**

**Endoplasmic reticulum stress response and bile acid**

**signatures associate with multi-strain**

**seroresponsiveness during elderly influenza vaccination**

**Christophe Carre, Glenn Wong, Vipin Narang, Crystal Tan, Joni Chong, Hui Xian Chin, Weili Xu, Yanxia Lu, Michelle Chua, Michael Poidinger, Paul Tambyah, Ma Nyunt, Tze Pin Ng, Daniel Larocque, Catherine Hessler, Nabil Bosco, Laurence Quemeneur, and Anis Larbi**

Supplemental Information

Supplemental Figures

A

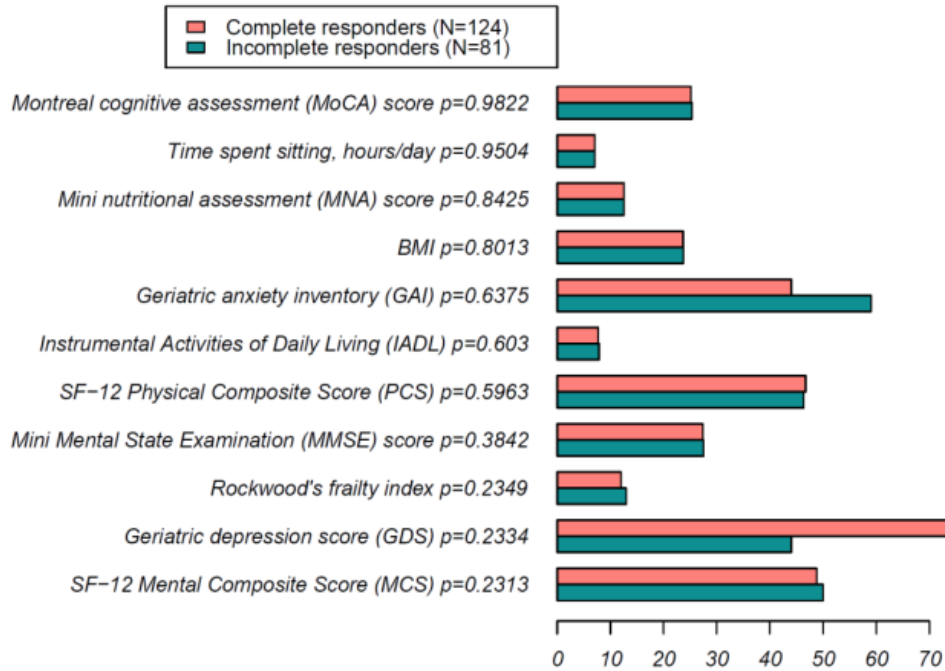

B

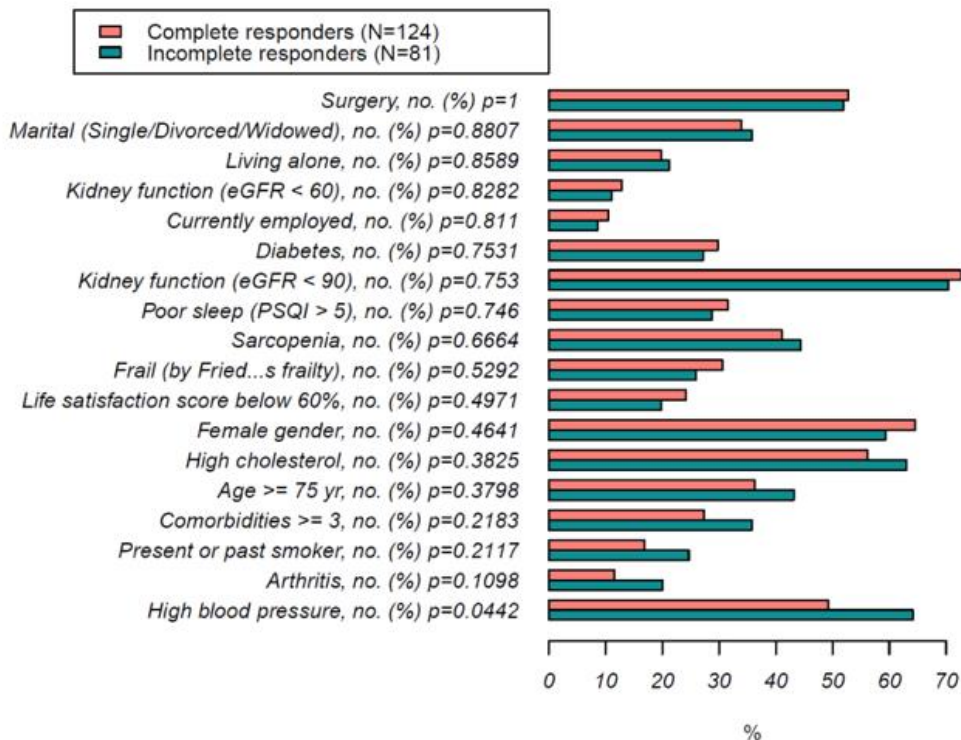

Figure S1. Baseline characteristics of CR and IR elderly subjects (n=205), Related to Figure 1. A. Continuous baseline characteristics and Wilcoxon test for CR vs IR (top) and B. Categorical baseline characteristics and Fisher test for CR vs IR (bottom).

*Flu B/Massachusetts/02/2012*

Day 0

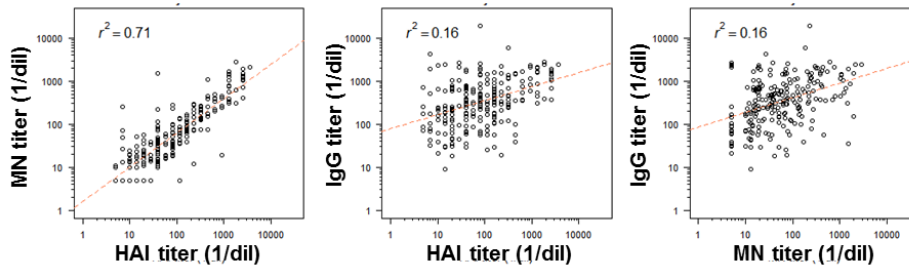

Day 28

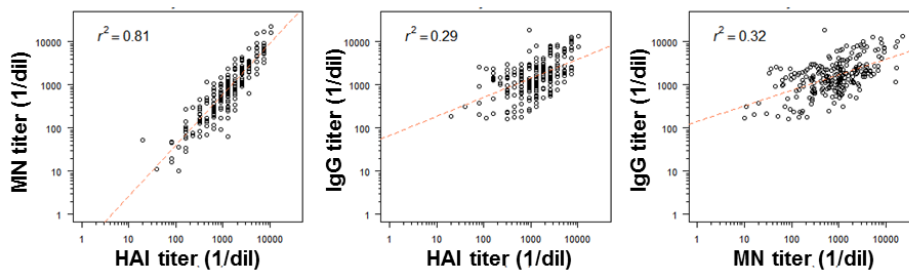

Figure S2. Correlations between HAI, MN and IgG titers at days 0 and 28 for Flu B/Massachusetts/02/2012 vaccine strain, Related to Figure 1. Correlations between MN and HAI titers, IgG and HAI titers; and IgG and MN titers (left to right) at day 0 and day 28 are shown for all three strains.

**A/H3N2/Texas/50/2012**

**Day 0**

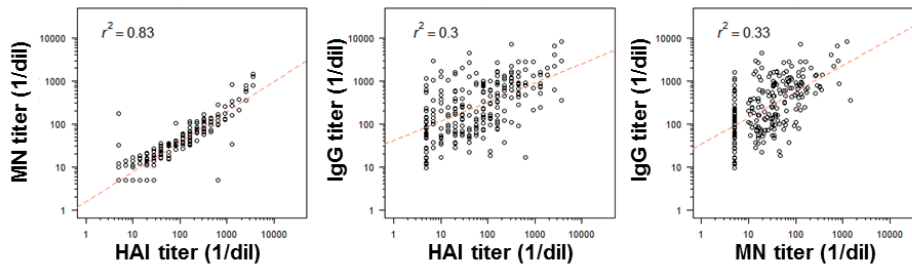

**Day 28**

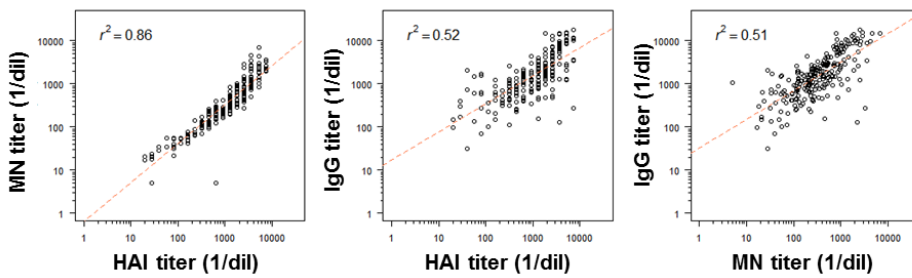

**Figure S3. Correlations between HAI, MN and IgG titers at days 0 and 28 for A/H3N2/Texas/50/2012 vaccine strain, Related to Figure 1.** Correlations between MN and HAI titers, IgG and HAI titers; and IgG and MN titers (left to right) at day 0 and day 28 are shown for all three strains.

# A/H1N1/California/07/2009

## Day 0

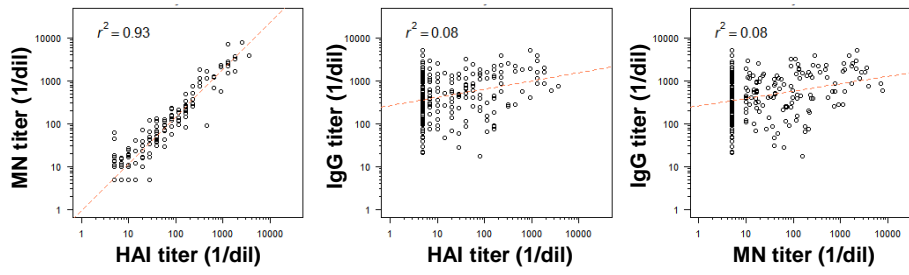

## Day 28

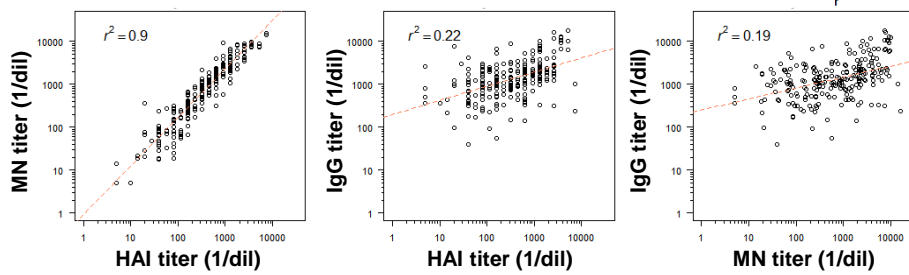

Figure S4. Correlations between HAI, MN and IgG titers at days 0 and 28 for A/H1N1/California/07/2009 vaccine strain, Related to Figure 1. Correlations between MN and HAI titers, IgG and HAI titers; and IgG and MN titers (left to right) at day 0 and day 28 are shown for all three strains.

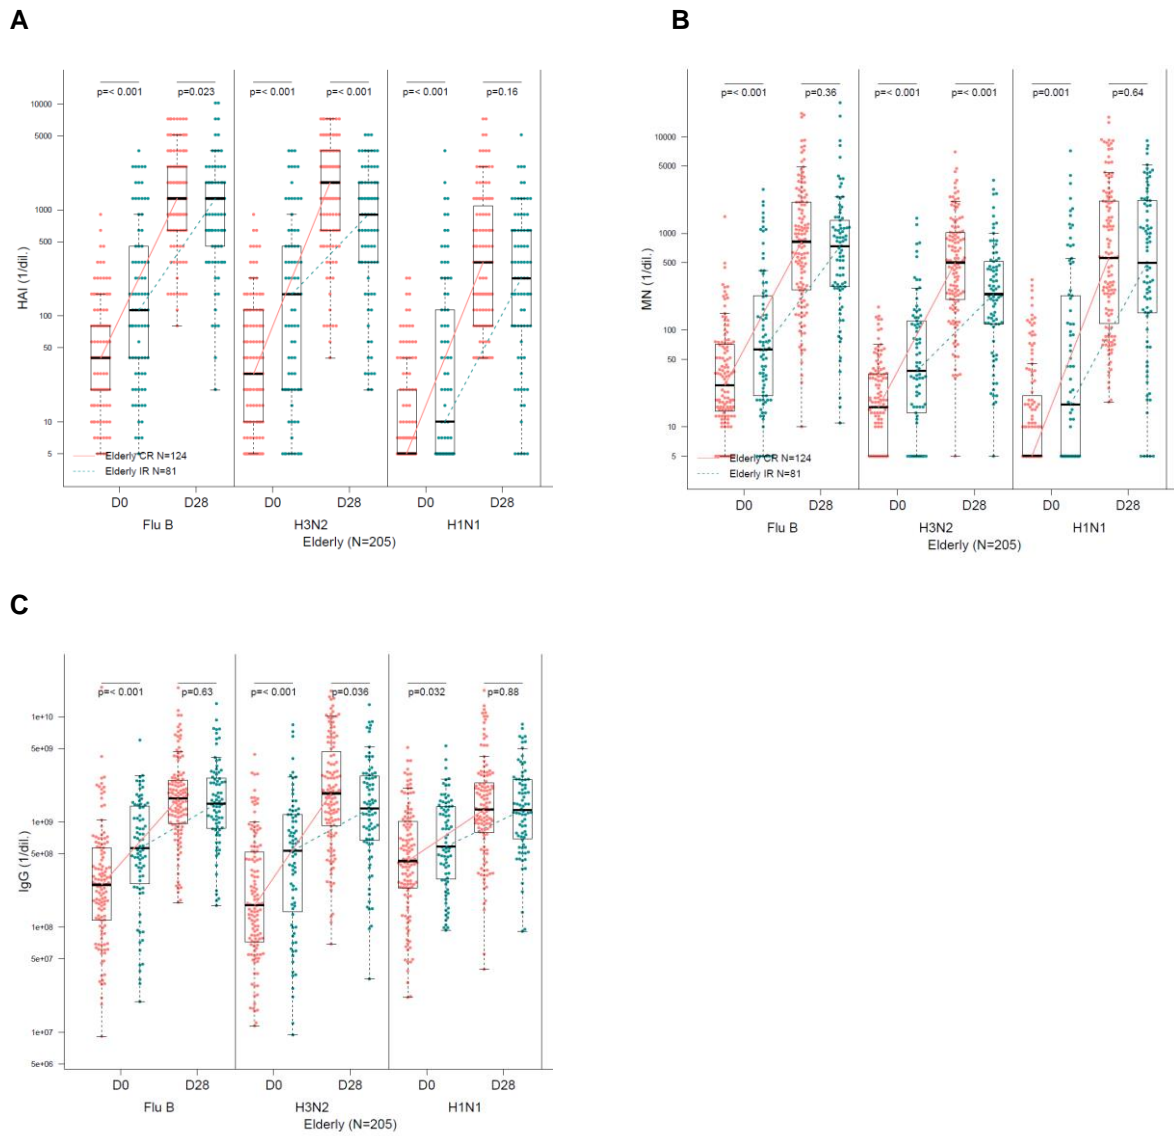

**Figure S5. Humoral response in CR and IR after vaccination in subjects aged >65 years (n=205), Related to Figure 1. A.** HAI titers for elderly CR (salmon) and IR (teal) for all vaccine strains (Wilcoxon test). **B.** MN titers for CR and IR across all vaccine strains. **C.** IgG titers for CR and IR across all vaccine strains.

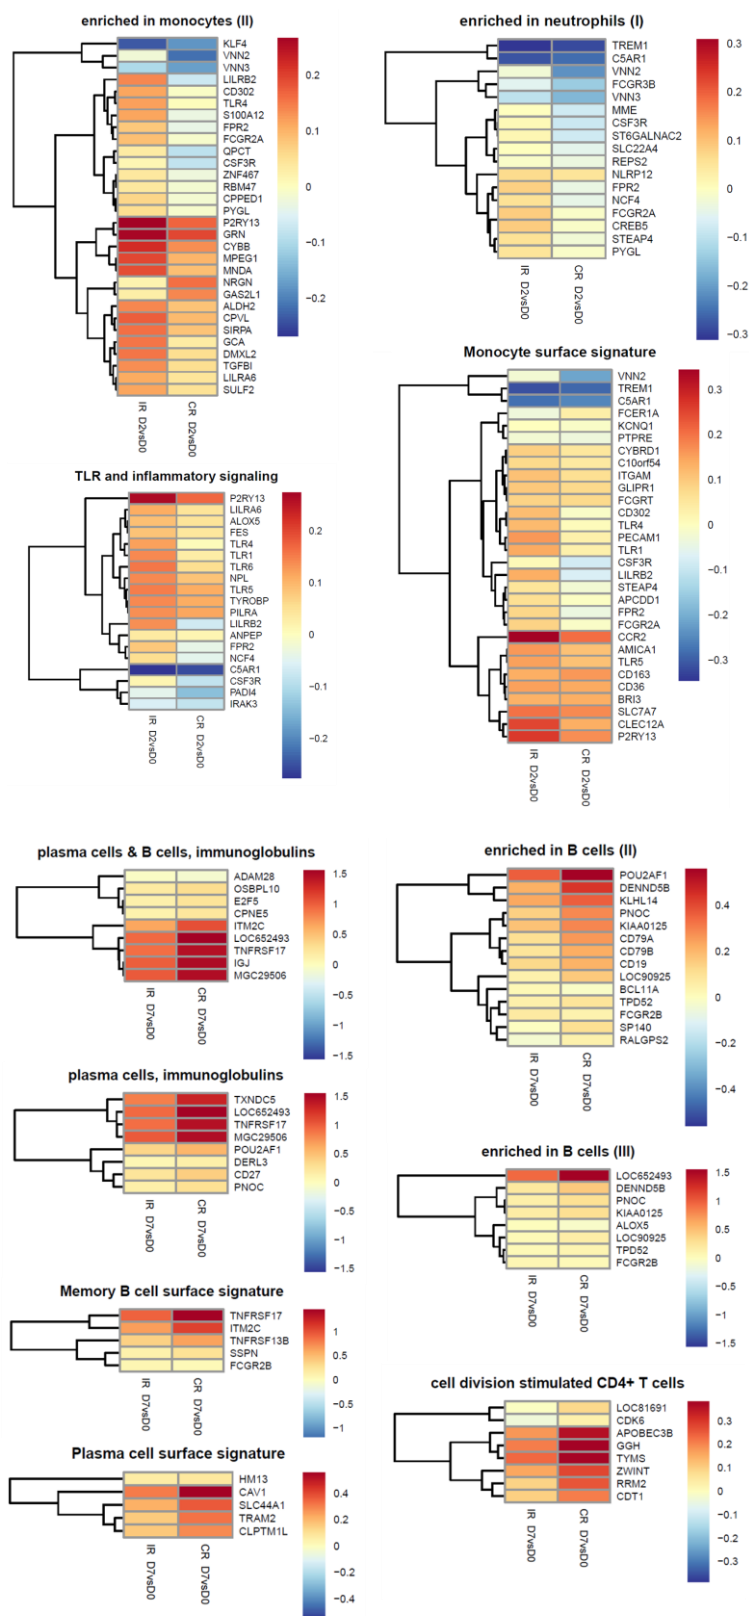

**Figure S6. Blood transcriptional modules that were differentially regulated between CR vs IR elderly subjects (n=142), Related to Figure 2.** Modulation of individual genes (log<sub>2</sub> FC day 2 vs day 0, or day 7 vs day 0) that constitute blood transcriptional modules that significantly differed between CR and IR.

**A**

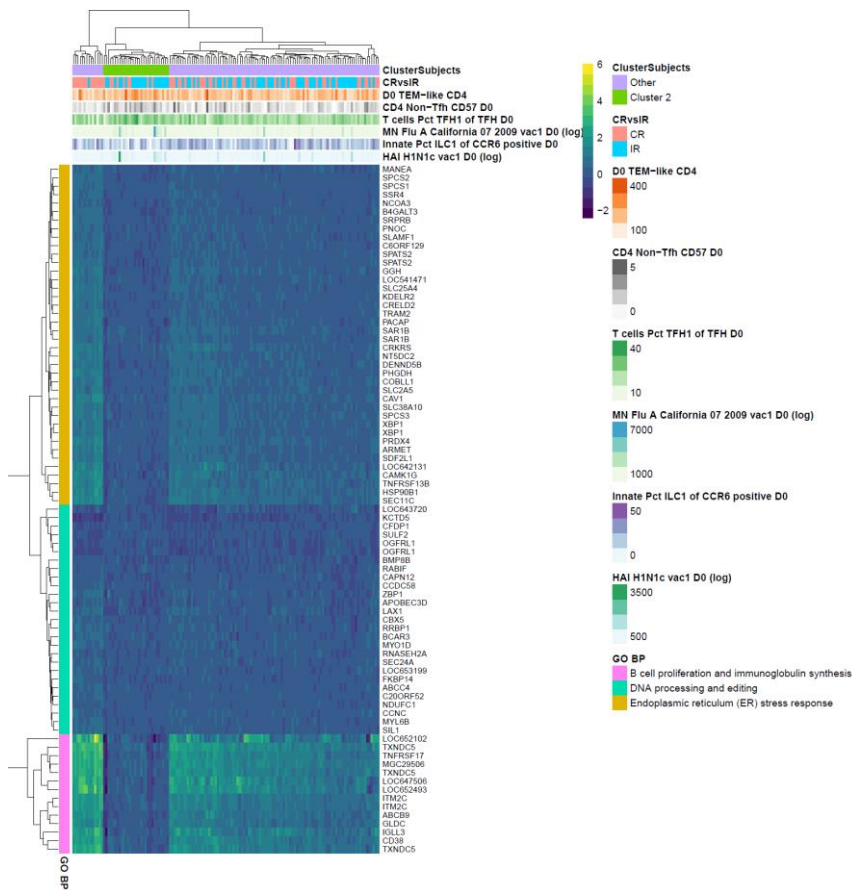

**B**

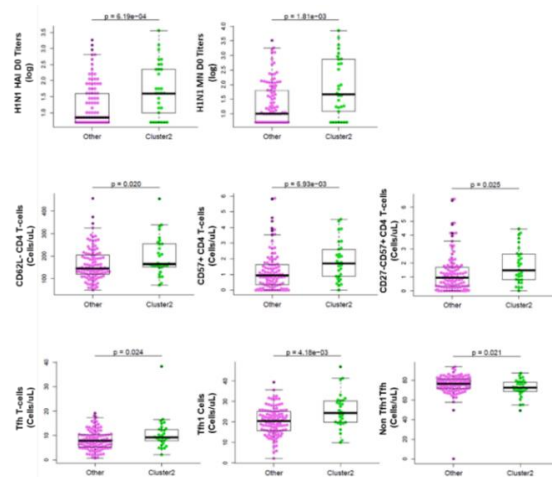

**Figure S7. Transcriptomic gene signatures of CR vs IR, Related to Figure 2. A** Heatmap and hierarchical clustering of 81 DEGs day 7 vs day 0 in CR vs. IR at FDR 5% ( $n=142$ ,  $\log_2$  FC) showing three main GO processes that are differentially regulated in the two groups. A group of subjects with high baseline immune levels is also shown (Cluster 2). **B.** Boxplots of the parameters where Cluster 2 and other subjects most significantly differ. Cluster 2 differed from other participants in terms of baseline H1N1 HAI and MN titers (top panel); percentages of differentiated CD62L-, CD57+ and CD27-CD57+ CD4 T-cells (middle panel) and Tfh1 cells (bottom).



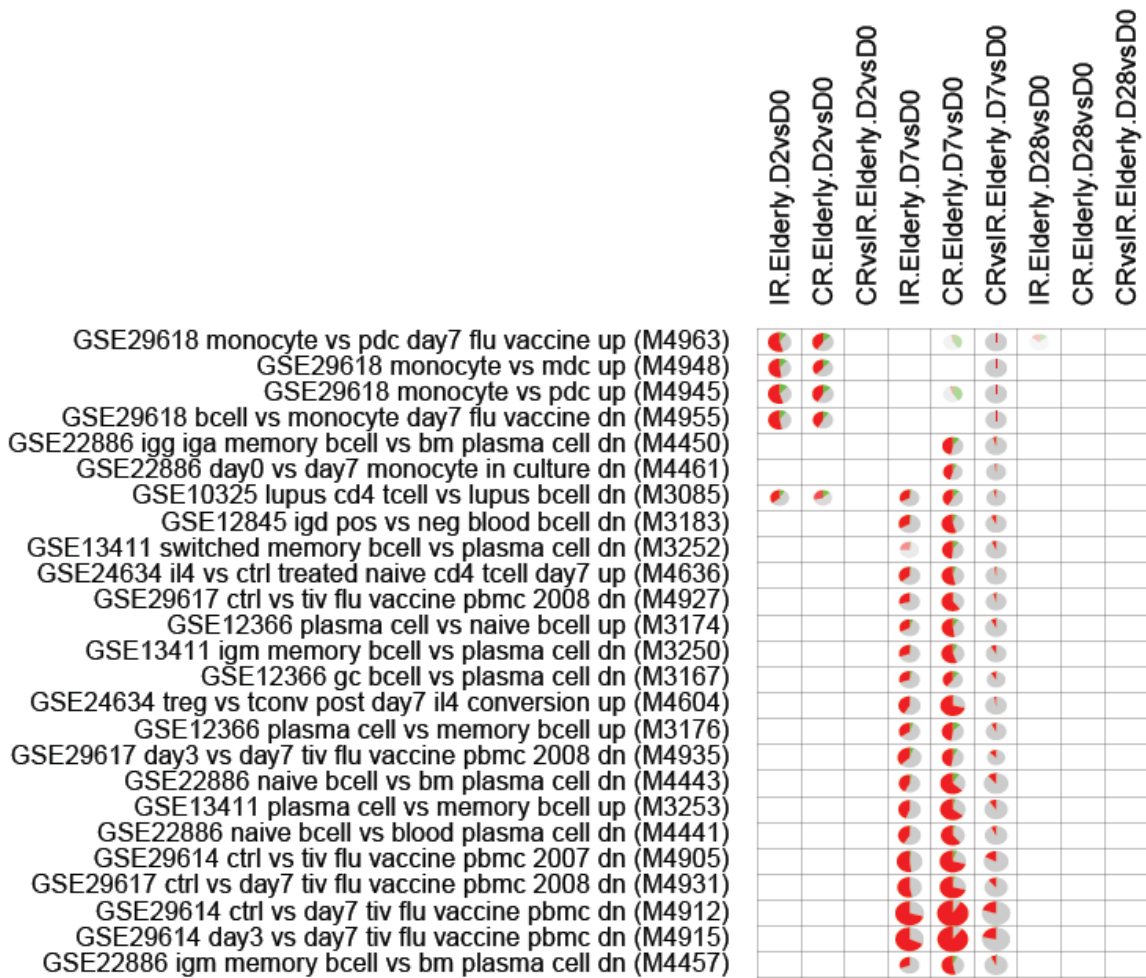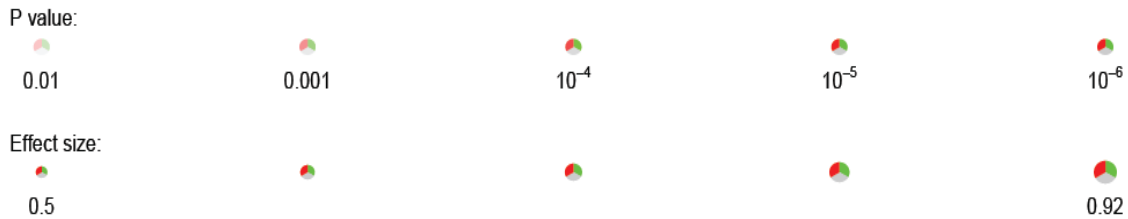

**Figure S8. Gene datasets from the C7 Molecule Signature Database that overlap with CR vs IR gene signature (n=142), Related to Figure 2.** The top 25 matches among 221 gene sets that significantly overlapped with CR vs IR DEGs across all time point comparisons are shown with their associated NCBI Gene Expression Omnibus ID numbers.

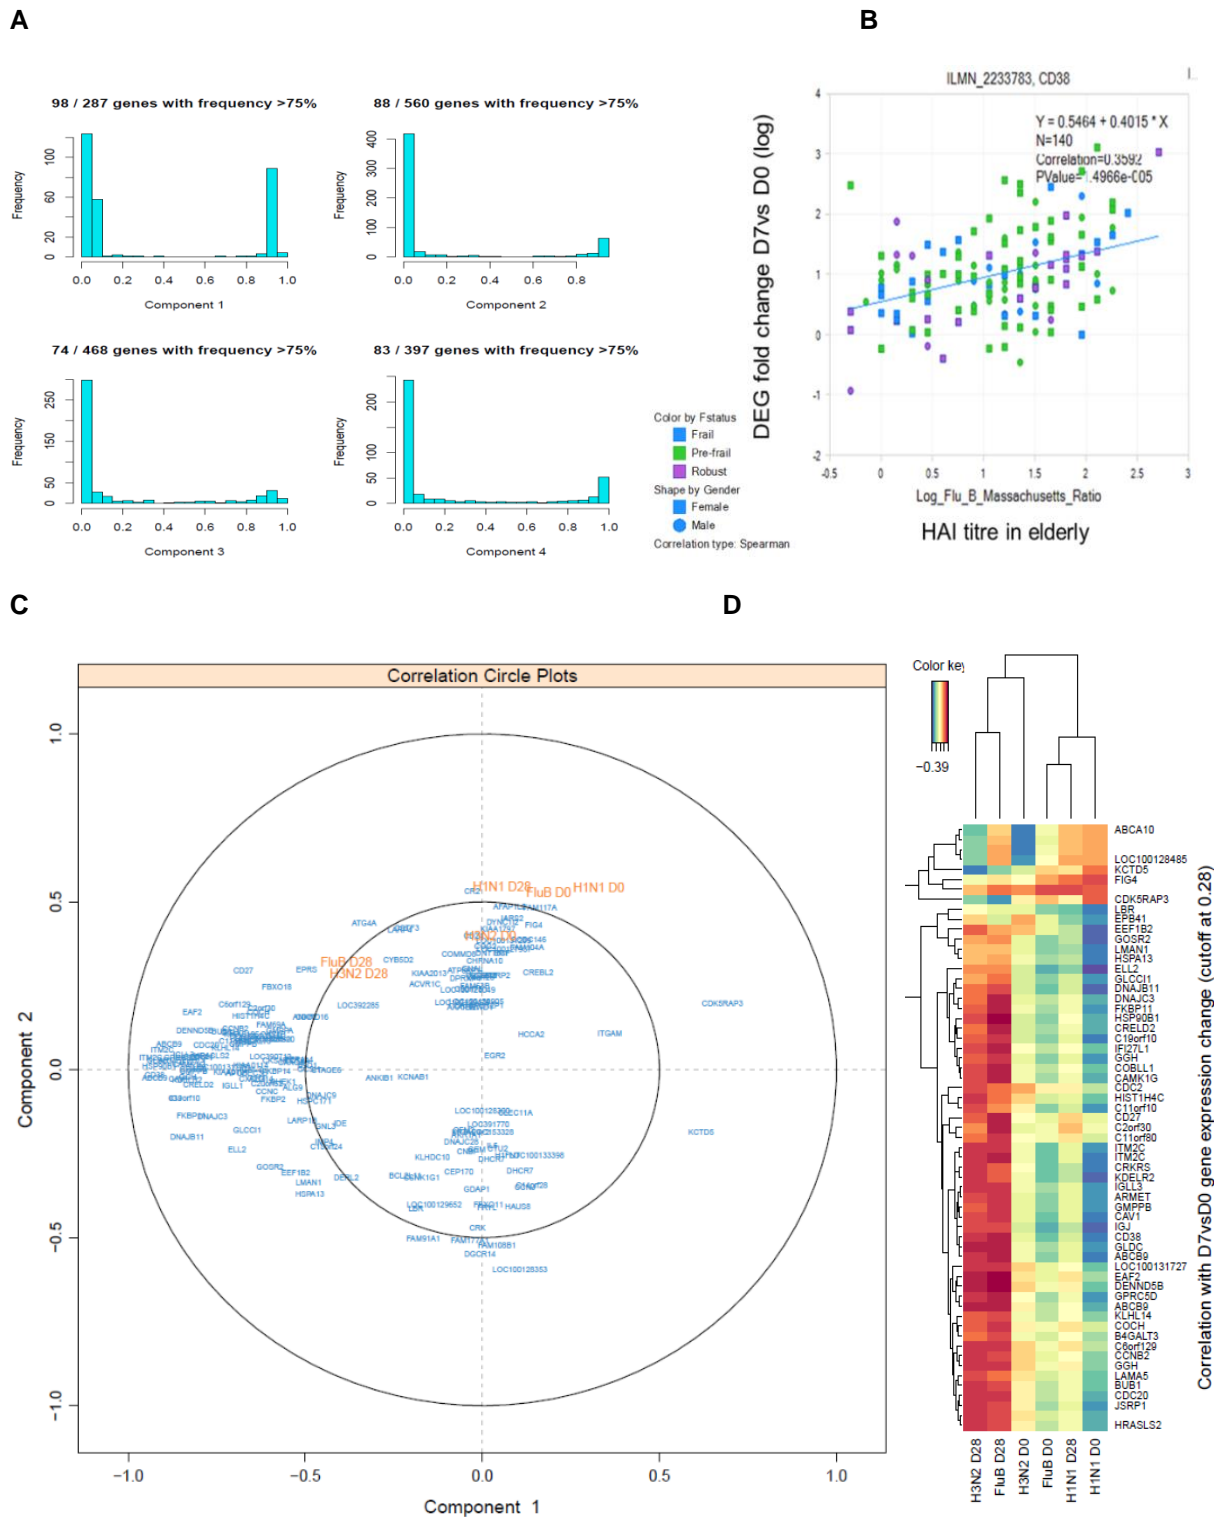

**Figure S9. Threshold free validation of the transcriptional signature of the CR vs IR humoral response (n=142), Related to Figure 2.** Sparse partial least square regression of day 0 and day 28 (log) titers (Y) against all three strains using day 7 vs day 0 (log<sub>2</sub>) gene expression (X). **A.** Selection of genes with frequency >75% using 10-fold cross (FC) validation. **B.** Regression between day 28/day 0 Flu B HAI titers and day 7/day 0 CD38 gene expression. **C.** Variable plot of the final model showing the implicated genes and the three strains HAI FC correlations. **D.** Heatmap of the top genes where HAI FC correlated with day 7 vs day 0 gene expression fold changes.

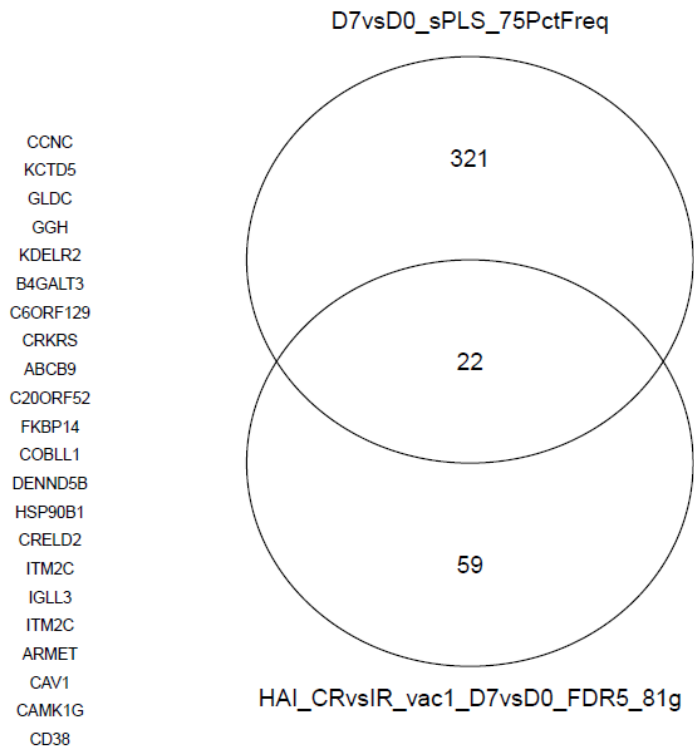

Universe : 13871 probes, p-value overlap = < 0.001

**Figure S10. Hypergeometric test of overlap of the DEGs and sparse PLS day 7vsD0 gene probes for CR vs IR, Related to Figure 2.**

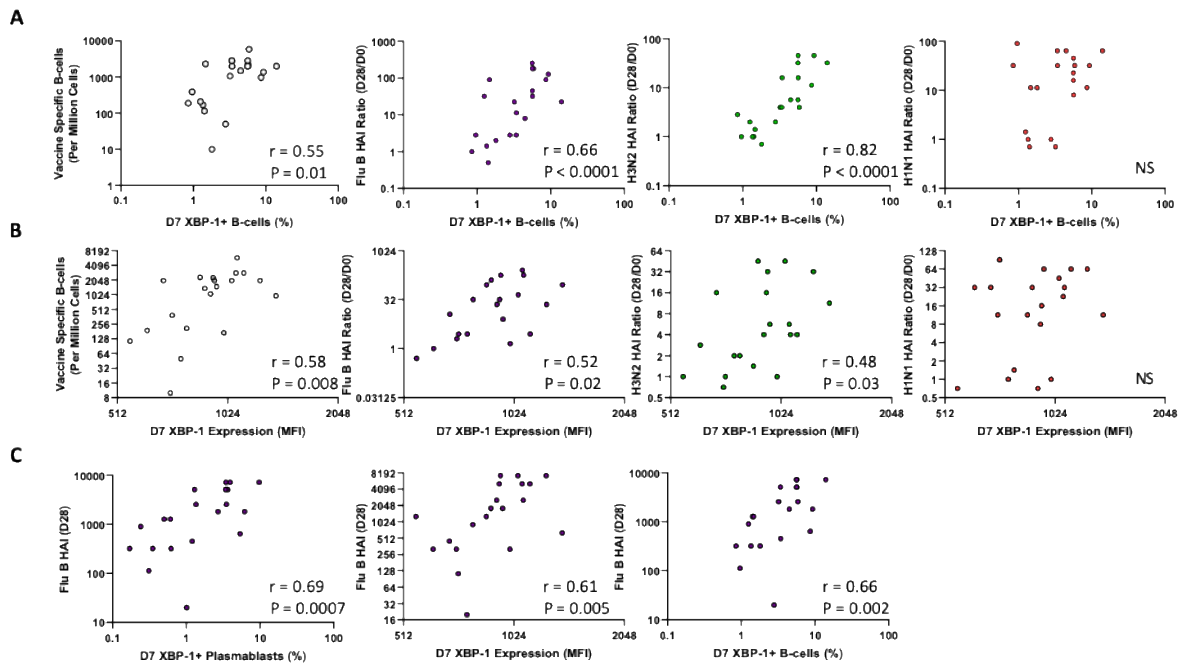

**Figure S11. XBP-1 protein expression in B cells and plasmablasts, Related to Figure 4. A.** Correlation between XBP-1 B-cell percentage and the vaccine response. **B.** Correlation between XBP-1 expression in plasmablasts (MFI) and the vaccine response. **C.** Correlation between XBP-1 expression in B-cells and plasmablasts with day 28 Flu B titers.

**A**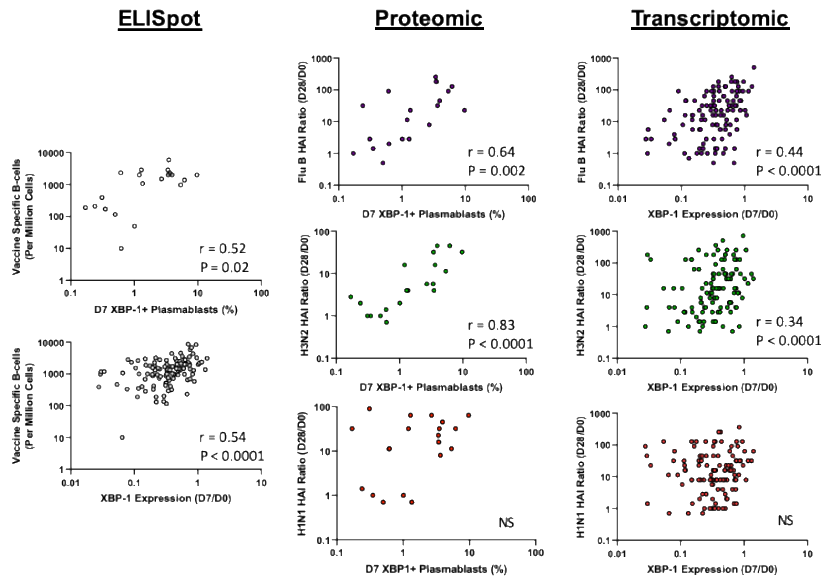**B**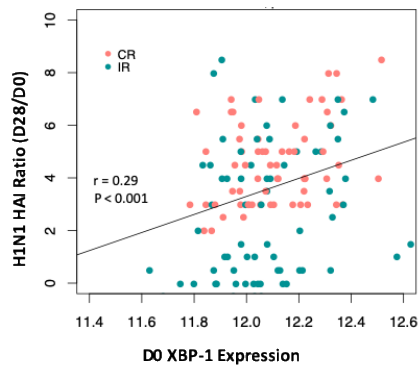**C**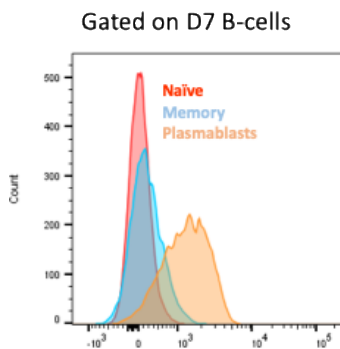**D**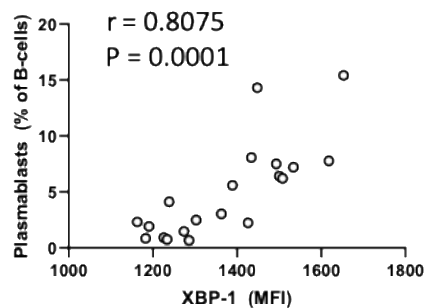**E**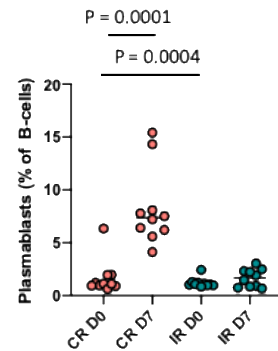

**Figure S12. XBP-1 protein and gene expression in plasmablasts, Related to Figure 4. A.** The association between XBP-1 proteomic and transcriptomic expression with the vaccine response. **B.** The correlation between day 0 XBP-1 gene expression in PBMCs and the H1N1 HAI day 28/day 0 ratio. **C.** Representative plot of XBP-1 expression in different B-cell subsets (gated on day 7 PBMCs). **D.** The correlation between XBP-1 expression and plasmablast percentages. **E.** The percentage of plasmablasts in CR on day 7. Pairwise comparisons were made by Mann-Whitney U test. Correlation tests were performed using the Spearman Rank Test, or the Pearson's test for part D only.

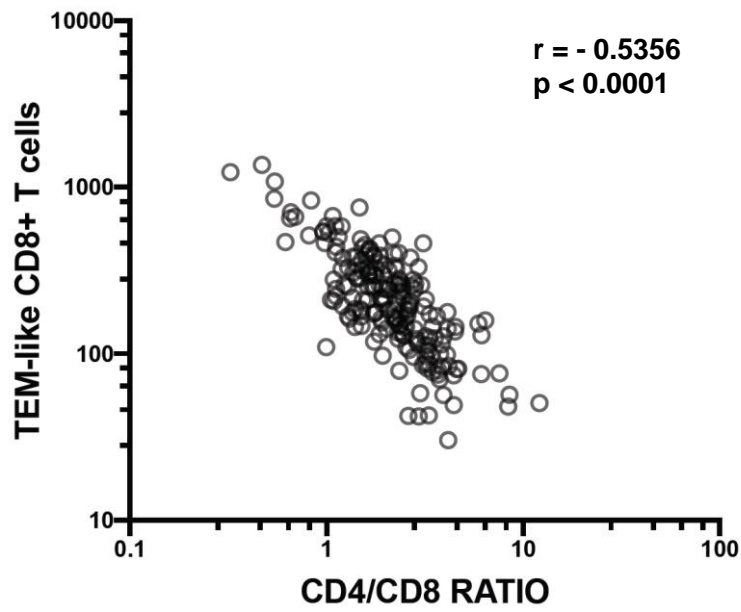

B

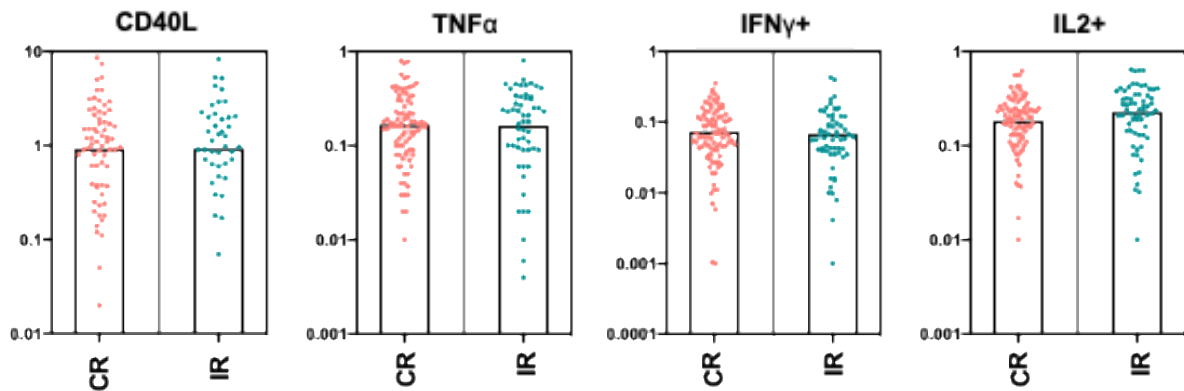

**Figure S13. Decoupling of CD4:CD8 ratios with the day 7 B-cell response in IRs, Related to Figure 5. A.** The correlation between the numbers of CD62L- TEM-like CD8 T cells and the CD4/CD8 ratio. **B.** The magnitudes of cytokine-specific CD4 T-cell responses in CR vs IR after *in vitro* vaccine stimulation.

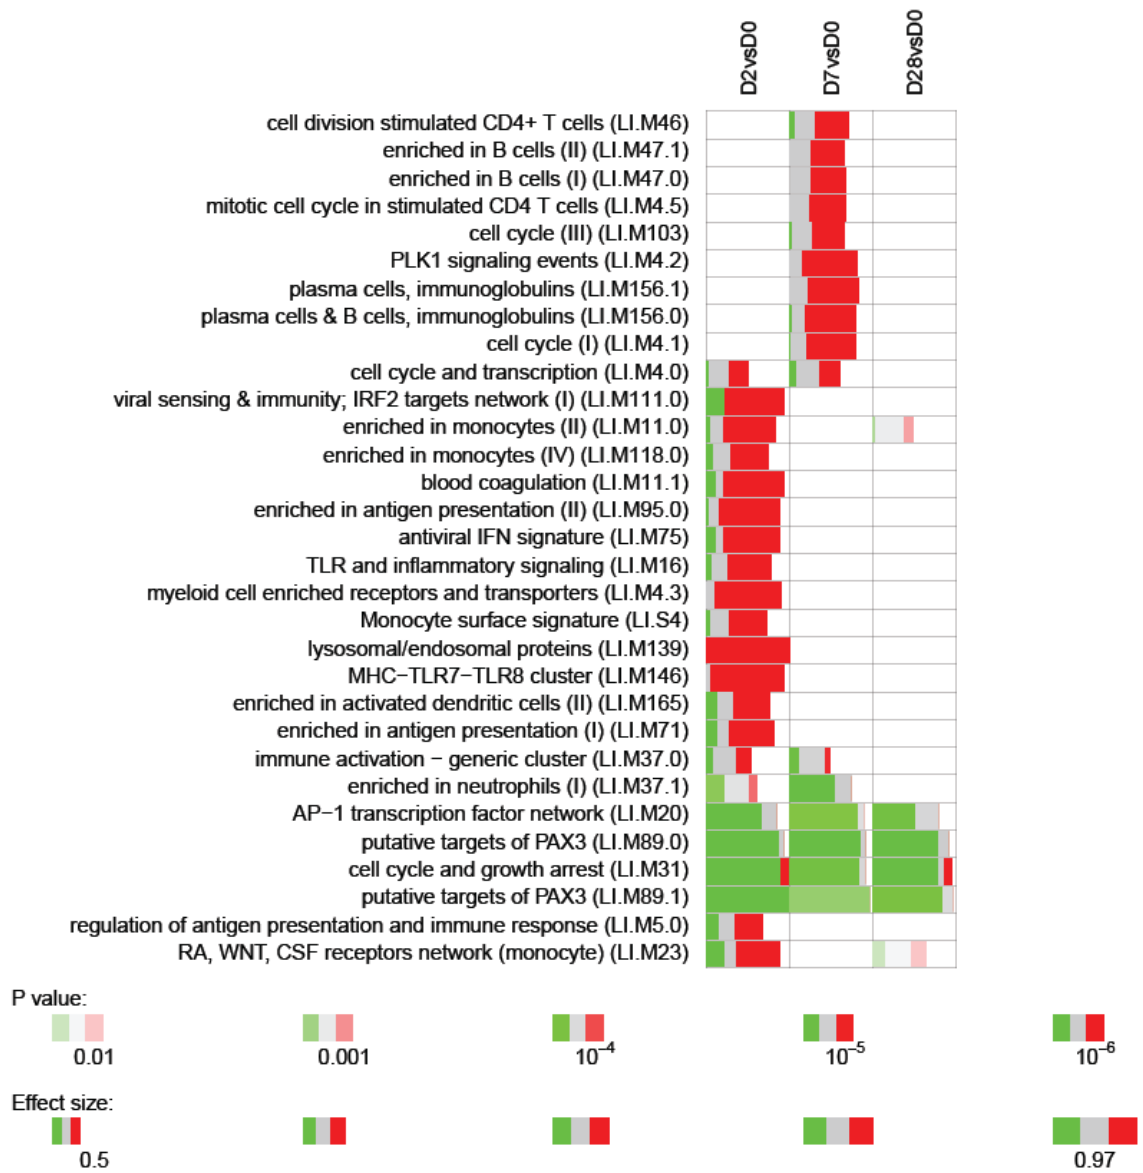

**Figure S14. Top blood transcriptional modules impacted by vaccination, Related to Figure 2.** The top 30 significant BTMs (among 149) are shown and annotated to show p-values and the proportion of genes that were modulated from baseline at day 2, day 7 or day 28.

Supplemental Tables

Table S1. Summary of HAI results in elderly subjects (n=205), Related to Figure 1

| Vaccination 1                                | Elderly CR<br>(N=124) | Elderly IR<br>(N=81) | Elderly<br>(N=205) | P value | test |
|----------------------------------------------|-----------------------|----------------------|--------------------|---------|------|
| <b>Flu B Massachusetts</b>                   |                       |                      |                    |         |      |
| GMT day 0 (1/dil.) [95% CI]                  | 42.8 [35, 52.3]       | 134 [91.4,           | 67.1 [54.5,        | <0.0001 | (d)  |
| Seroprotection day 0                         | 61.29%                | 75.31%               | 66.83%             | 0.0483  | (a)  |
| GMT day 28 (1/dil.)                          | 1320 [1100,           | 894 [687,            | 1130 [969,         | 0.0226  | (d)  |
| Seroprotection day 28                        | 100%                  | 98.77%               | 99.51%             | 0.3951  | (a)  |
| GMTR day 28/day 0                            | 30.8 [24.8,           | 6.68 [4.71,          | 16.8 [13.6,        | <0.0001 | (d)  |
| Seroconversion or                            | 100%                  | 53.09%               | 81.46%             | <0.0001 | (a)  |
| <b>Flu A H3N2 Texas</b>                      |                       |                      |                    |         |      |
| GMT day 0 (1/dil.)                           | 32.7 [25.6,           | 110 [71.2,           | 52.8 [41.5,        | <0.0001 | (d)  |
| Seroprotection day 0                         | 46.77%                | 65.43%               | 54.15%             | 0.01    | (a)  |
| GMT day 28 (1/dil.)                          | 1380 [1120,           | 621 [450,            | 1010 [834,         | <0.0001 | (d)  |
| Seroprotection day 28                        | 100%                  | 92.59%               | 97.07%             | 0.0034  | (a)  |
| GMTR day 28/day 0                            | 42.1 [33.6,           | 5.66 [3.97,          | 19 [15, 24.1]      | <0.0001 | (d)  |
| Seroconversion or                            | 100%                  | 48.15%               | 79.51%             | <0.0001 | (a)  |
| <b>Flu A H1N1 California</b>                 |                       |                      |                    |         |      |
| GMT day 0 (1/dil.)                           | 10.3 [8.55,           | 27.8 [18.2,          | 15.3 [12.3,        | 0.0009  | (d)  |
| Seroprotection day 0                         | 19.35%                | 40.74%               | 27.80%             | 0.0013  | (a)  |
| GMT day 28 (1/dil.)                          | 313 [244, 402]        | 194 [134,            | 259 [209, 320]     | 0.1585  | (d)  |
| Seroprotection day 28                        | 100%                  | 82.72%               | 93.17%             | <0.0001 | (a)  |
| GMTR day 28/day 0                            | 30.3 [24.4,           | 6.98 [4.83,          | 17 [13.6, 21.1]    | <0.0001 | (d)  |
| Seroconversion or                            | 100%                  | 50.62%               | 80.49%             | <0.0001 | (a)  |
| <b>Three strains</b>                         |                       |                      |                    |         |      |
| GM day 0 (1/dil.)                            | 24.3 [21.3,           | 74.2 [56,            | 37.8 [32.3,        | <0.0001 | (d)  |
| N strains with                               |                       |                      |                    | 0.0009  | (a)  |
| 0                                            | 20.97%                | 7.41%                | 15.61%             |         |      |
| 1                                            | 40.32%                | 29.63%               | 36.10%             |         |      |
| 2                                            | 29.03%                | 37.04%               | 32.20%             |         |      |
| 3                                            | 9.68%                 | 25.93%               | 16.10%             |         |      |
| GM day 28 (1/dil.)                           | 828 [718, 954]        | 476 [383,            | 665 [586, 755]     | <0.0001 | (d)  |
| N strains with                               |                       |                      |                    | <0.0001 | (a)  |
| 1                                            | 0%                    | 2.47%                | 0.98%              |         |      |
| 2                                            | 0%                    | 20.99%               | 8.29%              |         |      |
| 3                                            | 100%                  | 76.54%               | 90.73%             |         |      |
| GMTR day 28/day 0                            | 34 [29.7, 38.9]       | 6.41 [5.21,          | 17.6 [15, 20.7]    | <0.0001 | (d)  |
| N strains with seroconversion or significant |                       |                      |                    | <0.0001 | (a)  |
| 0                                            | 0%                    | 12.35%               | 4.88%              |         |      |
| 1                                            | 0%                    | 23.46%               | 9.27%              |         |      |
| 2                                            | 0%                    | 64.20%               | 25.37%             |         |      |
| 3                                            | 100%                  | 0%                   | 60.49%             |         |      |

(d) Wilcoxon

(a) Fisher

CR: complete (three strains) HAI responders, IR: incomplete HAI responders

GMT: geometric mean of titers, GMTR: geometric mean of titer individual ratios.

Seroconversion: pre-vaccination HAI titer <1:10 and a postvaccination HAI titer >1:40

Significant increase: pre-vaccination HAI titer >1:10 and a minimum four-fold rise in post-vaccination HAI antibody titer.

Seroprotection HAI antibody titer ≥1:40.



**Table S2. Immunogenicity GMT summary in elderly subjects (n=205), Related to Figure 1**

| Assay | Strain | Timepoint | Elderly CR        |                     |                   | p-value | test |
|-------|--------|-----------|-------------------|---------------------|-------------------|---------|------|
|       |        |           | (N=124)           | Elderly IR (N=81)   | Elderly (N=205)   |         |      |
| HAI   | Bm     | day 0     | 42.8 [35, 52.3]   | 134 [91.4, 196]     | 67.1 [54.5, 82.6] | <0.0001 | (d)  |
| HAI   | Bm     | day 28    | 1320 [1100, 1580] | 894 [687, 1160]     | 1130 [969, 1320]  | 0.0226  | (d)  |
| HAI   | Bm     | day       | 30.8 [24.8, 38.2] | 6.68 [4.71, 9.49]   | 16.8 [13.6, 20.9] | <0.0001 | (d)  |
| HAI   | H3N2t  | day 0     | 32.7 [25.6, 41.8] | 110 [71.2, 169]     | 52.8 [41.5, 67.1] | <0.0001 | (d)  |
| HAI   | H3N2t  | day 28    | 1380 [1120, 1700] | 621 [450, 858]      | 1010 [834, 1210]  | <0.0001 | (d)  |
| HAI   | H3N2t  | day       | 42.1 [33.6, 52.7] | 5.66 [3.97, 8.06]   | 19 [15, 24.1]     | <0.0001 | (d)  |
| HAI   | H1N1c  | day 0     | 10.3 [8.55, 12.4] | 27.8 [18.2, 42.4]   | 15.3 [12.3, 18.9] | 0.0009  | (d)  |
| HAI   | H1N1c  | day 28    | 313 [244, 402]    | 194 [134, 281]      | 259 [209, 320]    | 0.1585  | (d)  |
| HAI   | H1N1c  | day       | 30.3 [24.4, 37.8] | 6.98 [4.83, 10.1]   | 17 [13.6, 21.1]   | <0.0001 | (d)  |
| MN    | Bm     | day 0     | 31.3 [25.5, 38.4] | 77 [53.7, 110]      | 44.6 [36.6, 54.4] | <0.0001 | (d)  |
| MN    | Bm     | day 28    | 738 [569, 957]    | 601 [436, 828]      | 680 [556, 832]    | 0.362   | (d)  |
| MN    | Bm     | day       | 23.6 [18.1, 30.7] | 7.81 [5.43, 11.2]   | 15.2 [12.2, 19.1] | <0.0001 | (d)  |
| MN    | H3N2t  | day 0     | 16.7 [13.9, 20]   | 42.2 [30.1, 59.1]   | 24.1 [20.1, 28.9] | <0.0001 | (d)  |
| MN    | H3N2t  | day 28    | 440 [353, 549]    | 220 [164, 294]      | 334 [279, 401]    | 0.0002  | (d)  |
| MN    | H3N2t  | day       | 26.4 [21, 33.1]   | 5.21 [3.82, 7.09]   | 13.9 [11.2, 17.2] | <0.0001 | (d)  |
| MN    | H1N1c  | day 0     | 12.2 [9.81, 15.1] | 37.5 [23, 61.2]     | 19 [14.9, 24.2]   | 0.0015  | (d)  |
| MN    | H1N1c  | day 28    | 529 [391, 715]    | 409 [264, 634]      | 478 [371, 614]    | 0.6403  | (d)  |
| MN    | H1N1c  | day       | 43.5 [33.4, 56.7] | 10.9 [7.19, 16.5]   | 25.2 [19.7, 32.2] | <0.0001 | (d)  |
| IgG   | Bm     | day 0     | 2.5e+08 [2e+08,   | 5.01e+08 [3.81e+08, | 3.28e+08          | <0.0001 | (d)  |
| IgG   | Bm     | day 28    | 1.6e+09           | 1.49e+09 [1.22e+09, | 1.56e+09          | 0.6279  | (d)  |
| IgG   | Bm     | day       | 6.4 [5.23, 7.83]  | 2.98 [2.32, 3.84]   | 4.74 [4.02, 5.6]  | <0.0001 | (d)  |
| IgG   | H3N2t  | day 0     | 1.85e+08          | 3.99e+08 [2.87e+08, | 2.5e+08           | 0.0002  | (d)  |
| IgG   | H3N2t  | day 28    | 1.84e+09          | 1.24e+09 [9.56e+08, | 1.58e+09          | 0.0357  | (d)  |
| IgG   | H3N2t  | day       | 9.97 [7.65, 13]   | 3.1 [2.31, 4.16]    | 6.31 [5.1, 7.8]   | <0.0001 | (d)  |
| IgG   | H1N1c  | day 0     | 4.23e+08          | 6.17e+08 [4.96e+08, | 4.9e+08           | 0.0321  | (d)  |
| IgG   | H1N1c  | day 28    | 1.33e+09          | 1.28e+09 [1.03e+09, | 1.31e+09          | 0.8774  | (d)  |
| IgG   | H1N1c  | day       | 3.15 [2.56, 3.88] | 2.08 [1.68, 2.57]   | 2.68 [2.3, 3.12]  | 0.0108  | (d)  |

(d) Wilcoxon Test

CR: complete (three strains) HAI responders, IR: incomplete HAI responders

GMT: geometric mean of titers and 95% confidence interval.

Bm : Flu B Massachusetts 02 2012

H3N2t : Flu A (H3N2) Texas 50 2012

H1N1c : Flu A (H1N1) California 07 2009

**Table S3. Blood transcriptional modules that were differentially modulated between CR vs IR for at least one time point (n = 142, FDR BH 5%), Related to Figure 2**

**Day 2 vs Day 0**

| <b>BTM</b> | <b>Title</b>                            | <b>AUC IR Elderly</b> | <b>q IR Elderly</b> | <b>AUC CR Elderly</b> | <b>q CR Elderly</b> | <b>AUC CRvsIR Elderly</b> | <b>q CRvsIR Elderly</b> |
|------------|-----------------------------------------|-----------------------|---------------------|-----------------------|---------------------|---------------------------|-------------------------|
| LI.M11.0   | enriched in monocytes (II)              | 0.8013                | 0.0000              | 0.7021                | 0.0000              |                           |                         |
| LI.M16     | TLR and inflammatory signaling          | 0.7541                | 0.0000              | 0.6421                | 0.0009              |                           |                         |
| LI.M37.1   | enriched in neutrophils (I)             |                       |                     |                       |                     |                           |                         |
| LI.S4      | Monocyte surface signature              | 0.7198                | 0.0000              | 0.6126                | 0.0001              |                           |                         |
| LI.S9      | Memory B cell surface signature         |                       |                     |                       |                     |                           |                         |
| LI.M156.0  | plasma cells & B cells, immunoglobulins |                       |                     |                       |                     |                           |                         |
| LI.M47.1   | enriched in B cells (II)                |                       |                     |                       |                     |                           |                         |
| LI.M47.2   | enriched in B cells (III)               |                       |                     |                       |                     |                           |                         |
| LI.M4.1    | cell cycle (I)                          |                       |                     |                       |                     |                           |                         |
| LI.S3      | Plasma cell surface signature           |                       |                     |                       |                     |                           |                         |
| LI.M4.0    | cell cycle and transcription            | 0.5782                | 0.0000              | 0.5391                | 0.0000              |                           |                         |
| LI.M46     | cell division stimulated CD4+ T cells   |                       |                     |                       |                     |                           |                         |
| LI.M156.1  | plasma cells, immunoglobulins           |                       |                     |                       |                     |                           |                         |

## Day 7 vs Day 0

| BTM       | Title                                   | AUC IR Elderly | q IR Elderly | AUC CR Elderly | q CR Elderly | AUC CRvsIR Elderly | q CRvsIR Elderly |
|-----------|-----------------------------------------|----------------|--------------|----------------|--------------|--------------------|------------------|
| LI.M11.0  | enriched in monocytes (II)              |                |              |                |              | 0.6438             | 0.0000           |
| LI.M16    | TLR and inflammatory signaling          |                |              |                |              |                    |                  |
| LI.M37.1  | enriched in neutrophils (I)             | 0.6593         | 0.0294       | 0.7565         | 0.0001       |                    |                  |
| LI.S4     | Monocyte surface signature              |                |              |                |              |                    |                  |
| LI.S9     | Memory B cell surface signature         | 0.7470         | 0.0001       | 0.6242         | 0.0001       | 0.5628             | 0.0016           |
| LI.M156.0 | plasma cells & B cells, immunoglobulins | 0.8241         | 0.0000       | 0.8000         | 0.0000       | 0.6015             | 0.0001           |
| LI.M47.1  | enriched in B cells (II)                | 0.6065         | 0.0014       | 0.6657         | 0.0000       | 0.6329             | 0.0018           |
| LI.M47.2  | enriched in B cells (III)               | 0.6449         | 0.0099       | 0.6836         | 0.0004       | 0.6440             | 0.0301           |
| LI.M4.1   | cell cycle (I)                          | 0.8043         | 0.0000       | 0.8308         | 0.0000       | 0.6524             | 0.0002           |
| LI.S3     | Plasma cell surface signature           | 0.7417         | 0.0013       | 0.7274         | 0.0001       | 0.6546             | 0.0063           |
| LI.M4.0   | cell cycle and transcription            | 0.6092         | 0.0000       | 0.6720         | 0.0000       | 0.6635             | 0.0000           |
| LI.M46    | cell division stimulated CD4+ T cells   | 0.7574         | 0.0001       | 0.8147         | 0.0000       | 0.7286             | 0.0049           |
| LI.M156.1 | plasma cells, immunoglobulins           | 0.9279         | 0.0000       | 0.8878         | 0.0000       | 0.9240             | 0.0000           |

## Day 28 vs Day 0

| BTM       | Title                                   | AUC IR Elderly | q IR Elderly | AUC CR Elderly | q CR Elderly | AUC CRvsIR Elderly | q CRvsIR Elderly |
|-----------|-----------------------------------------|----------------|--------------|----------------|--------------|--------------------|------------------|
| LI.M11.0  | enriched in monocytes (II)              |                |              |                |              | 0.6173             | 0.0001           |
| LI.M16    | TLR and inflammatory signaling          |                |              |                |              | 0.6717             | 0.0020           |
| LI.M37.1  | enriched in neutrophils (I)             |                |              | 0.6961         | 0.0006       | 0.6506             | 0.0238           |
| LI.S4     | Monocyte surface signature              |                |              |                |              | 0.6048             | 0.0473           |
| LI.S9     | Memory B cell surface signature         |                |              |                |              |                    |                  |
| LI.M156.0 | plasma cells & B cells, immunoglobulins |                |              |                |              |                    |                  |
| LI.M47.1  | enriched in B cells (II)                |                |              |                |              |                    |                  |
| LI.M47.2  | enriched in B cells (III)               |                |              |                |              |                    |                  |
| LI.M4.1   | cell cycle (I)                          |                |              |                |              |                    |                  |
| LI.S3     | Plasma cell surface signature           |                |              |                |              |                    |                  |
| LI.M4.0   | cell cycle and transcription            |                |              |                |              |                    |                  |
| LI.M46    | cell division stimulated CD4+ T cells   |                |              |                |              |                    |                  |
| LI.M156.1 | plasma cells, immunoglobulins           |                |              |                |              |                    |                  |

Li et al. BTM with at least one significant adjusted p-value (Benjamini & Hochberg) for day 2 vs day 0, day 7 vs day 0 or day 28 vs day 0, between CR and IR.

**Table S4. Upstream regulator Ingenuity Pathway Analysis of differentially expressed genes for day 7 vs day 0 in CR vs IR (n = 142, FDR BH 15%), Related to Figure 2**

| <u>Upstream Regulator</u> | <u>Expr Fold Change</u> | <u>Molecule Type</u>                                       | <u>Predicted Activation State</u> | <u>Activation z-score</u> | <u>P-value of overlap</u> |
|---------------------------|-------------------------|------------------------------------------------------------|-----------------------------------|---------------------------|---------------------------|
| cyclosporin A             |                         | biologic drug                                              |                                   | -1.229                    | 1.01E-02                  |
| XBP1                      | 1.151                   | transcription regulator                                    | Activated                         | 4.585                     | 1.12E-16                  |
| TCR                       |                         | complex                                                    |                                   | 0.943                     | 1.21E-03                  |
| UCP1                      |                         | transporter                                                | Activated                         | 2.213                     | 1.31E-02                  |
| CD40LG                    |                         | cytokine                                                   |                                   | 1.741                     | 1.51E-02                  |
| 1,2-dithiol-3-thione      |                         | chemical reagent                                           | Activated                         | 2.423                     | 1.63E-02                  |
| IL21                      |                         | cytokine                                                   |                                   | 1.410                     | 1.75E-02                  |
| FBXO32                    |                         | enzyme                                                     |                                   | 1.633                     | 1.81E-04                  |
| estrogen                  |                         | chemical drug                                              |                                   | 1.593                     | 1.93E-02                  |
| mir-8                     |                         | microRNA                                                   |                                   | -1.154                    | 2.11E-02                  |
| IL5                       |                         | cytokine                                                   | Activated                         | 2.864                     | 2.34E-05                  |
| thapsigargin              |                         | chemical toxicant                                          | Activated                         | 2.156                     | 3.01E-02                  |
| D-glucose                 |                         | chemical - endogenous mammalian                            |                                   | -1.904                    | 3.01E-02                  |
| CpG oligonucleotide       |                         | chemical drug                                              |                                   | 1.176                     | 3.12E-02                  |
| CD38                      | 1.341                   | enzyme                                                     | Activated                         | 2.934                     | 3.12E-05                  |
| BRD4                      |                         | kinase                                                     | Activated                         | 2.236                     | 3.52E-04                  |
| mibolerone                |                         | chemical drug                                              | Activated                         | 2.646                     | 3.87E-04                  |
| IL2                       |                         | cytokine                                                   |                                   | 1.535                     | 4.02E-02                  |
| NFE2L2                    |                         | transcription regulator                                    | Activated                         | 2.621                     | 4.28E-02                  |
| ERN1                      |                         | kinase                                                     | Activated                         | 3.079                     | 4.31E-07                  |
| KLF3                      |                         | transcription regulator                                    | Activated                         | 2.000                     | 4.35E-01                  |
| CD3                       |                         | complex                                                    |                                   | 1.258                     | 4.45E-03                  |
| ATF6                      |                         | transcription regulator                                    |                                   | 1.941                     | 4.45E-04                  |
| tunicamycin               |                         | chemical - endogenous non-mammalian transmembrane receptor | Activated                         | 3.193                     | 4.64E-06                  |
| TLR9                      |                         | receptor                                                   |                                   | 1.400                     | 4.82E-02                  |
| lipopolysaccharide        |                         | chemical drug                                              | Activated                         | 3.228                     | 4.93E-02                  |

**Table S5. Correlation between bile acid levels and HAI response, Related to Figure 6**

| Analyte            | r.FluB | FluB.p       | r. H1N1 | H1N1.p       | r. H3N2 | H3N2.p       |
|--------------------|--------|--------------|---------|--------------|---------|--------------|
| alloLCA (ng/mL)    | 0.151  | <b>0.031</b> | 0.083   | 0.238        | -0.015  | 0.833        |
| TUDCA (ng/mL)      | -0.131 | 0.063        | -0.120  | 0.088        | -0.094  | 0.180        |
| dehydroLCA (ng/mL) | 0.130  | 0.064        | -0.011  | 0.879        | 0.059   | 0.401        |
| CDCA-3Gln (ng/mL)  | -0.089 | 0.204        | -0.035  | 0.619        | -0.121  | 0.086        |
| GCDCA (ng/mL)      | -0.087 | 0.218        | -0.067  | 0.344        | -0.092  | 0.193        |
| apoCA (ng/mL)      | -0.085 | 0.225        | 0.036   | 0.607        | 0.025   | 0.719        |
| 7-DHCA (ng/mL)     | -0.066 | 0.347        | -0.138  | <b>0.049</b> | -0.141  | <b>0.045</b> |
| TCA (ng/mL)        | -0.002 | 0.979        | -0.021  | 0.767        | -0.064  | 0.363        |
